# Supplementary material for: A positive feedback loop mediates crosstalk between calcium, cyclic nucleotide and lipid signalling in calcium-induced Toxoplasma gondii egress
Source: PLoS Pathog. 2022 Oct 20;18(10):e1010901. doi: 10.1371/journal.ppat.1010901 (PMC9624417; doi:10.1371/journal.ppat.1010901)
Supplement: S5 Table — Gene ontology analysis results of protein found to be differentially down-regulated and CDPK3 dependent in A23187 timecourse. (XLSX) [file ppat.1010901.s016.xlsx]

## Sheet: Biological Process
Cluster	# GO	enrichment	name	ratio_in_study	ratio_in_pop	p_uncorrected	study_count	p_fdr_bh	study_items
A	GO:0000226	enriched	microtubule cytoskeleton organization	1/32	4/8460	0.0150470488322	1	1.0	TGGT1_263510
A	GO:0007010	enriched	cytoskeleton organization	1/32	9/8460	0.0335476342155	1	1.0	TGGT1_263510
B	GO:0019222	enriched	regulation of metabolic process	3/17	128/8460	0.00196993434693	3	0.941783196288844	TGGT1_203050, TGGT1_216430, TGGT1_313300
B	GO:0006101	enriched	citrate metabolic process	1/17	5/8460	0.0100093402811	1	0.941783196288844	TGGT1_244200
B	GO:0006099	enriched	tricarboxylic acid cycle	1/17	5/8460	0.0100093402811	1	0.941783196288844	TGGT1_244200
B	GO:0009060	enriched	aerobic respiration	1/17	5/8460	0.0100093402811	1	0.941783196288844	TGGT1_244200
B	GO:0050789	enriched	regulation of biological process	3/17	242/8460	0.0116820724735	3	0.941783196288844	TGGT1_203050, TGGT1_216430, TGGT1_313300
B	GO:0006355	enriched	regulation of transcription, DNA-templated	2/17	84/8460	0.0120276924944	2	0.941783196288844	TGGT1_203050, TGGT1_313300
B	GO:1903506	enriched	regulation of nucleic acid-templated transcription	2/17	84/8460	0.0120276924944	2	0.941783196288844	TGGT1_203050, TGGT1_313300
B	GO:2001141	enriched	regulation of RNA biosynthetic process	2/17	84/8460	0.0120276924944	2	0.941783196288844	TGGT1_203050, TGGT1_313300
B	GO:0051252	enriched	regulation of RNA metabolic process	2/17	84/8460	0.0120276924944	2	0.941783196288844	TGGT1_203050, TGGT1_313300
B	GO:0019219	enriched	regulation of nucleobase-containing compound metabolic process	2/17	86/8460	0.0125811424448	2	0.941783196288844	TGGT1_203050, TGGT1_313300
B	GO:0072350	enriched	tricarboxylic acid metabolic process	1/17	7/8460	0.0139866117602	1	0.941783196288844	TGGT1_244200
B	GO:2000112	enriched	regulation of cellular macromolecule biosynthetic process	2/17	91/8460	0.0140130158185	2	0.941783196288844	TGGT1_203050, TGGT1_313300
B	GO:0009889	enriched	regulation of biosynthetic process	2/17	91/8460	0.0140130158185	2	0.941783196288844	TGGT1_203050, TGGT1_313300
B	GO:0031326	enriched	regulation of cellular biosynthetic process	2/17	91/8460	0.0140130158185	2	0.941783196288844	TGGT1_203050, TGGT1_313300
B	GO:0010556	enriched	regulation of macromolecule biosynthetic process	2/17	91/8460	0.0140130158185	2	0.941783196288844	TGGT1_203050, TGGT1_313300
B	GO:0010468	enriched	regulation of gene expression	2/17	95/8460	0.0152074287926	2	0.941783196288844	TGGT1_203050, TGGT1_313300
B	GO:0016999	enriched	antibiotic metabolic process	1/17	8/8460	0.0159696033134	1	0.941783196288844	TGGT1_244200
B	GO:0065007	enriched	biological regulation	3/17	272/8460	0.0160017626196	3	0.941783196288844	TGGT1_203050, TGGT1_216430, TGGT1_313300
B	GO:0031323	enriched	regulation of cellular metabolic process	2/17	99/8460	0.0164445796085	2	0.941783196288844	TGGT1_203050, TGGT1_313300
B	GO:0051171	enriched	regulation of nitrogen compound metabolic process	2/17	101/8460	0.0170789698809	2	0.941783196288844	TGGT1_203050, TGGT1_313300
B	GO:0080090	enriched	regulation of primary metabolic process	2/17	101/8460	0.0170789698809	2	0.941783196288844	TGGT1_203050, TGGT1_313300
B	GO:0060255	enriched	regulation of macromolecule metabolic process	2/17	107/8460	0.0190443939059	2	1.0	TGGT1_203050, TGGT1_313300
B	GO:0045333	enriched	cellular respiration	1/17	16/8460	0.0316989540531	1	1.0	TGGT1_244200
B	GO:0015980	enriched	energy derivation by oxidation of organic compounds	1/17	18/8460	0.0355941507299	1	1.0	TGGT1_244200
B	GO:0055114	enriched	oxidation-reduction process	2/17	155/8460	0.0378855571305	2	1.0	TGGT1_219630, TGGT1_244200
B	GO:0043087	enriched	regulation of GTPase activity	1/17	21/8460	0.0414093039472	1	1.0	TGGT1_216430
B	GO:0008150	enriched	biological_process	8/17	2049/8460	0.0424804704023	8	1.0	TGGT1_203050, TGGT1_213030, TGGT1_216430, TGGT1_219630, TGGT1_244200, TGGT1_294280, TGGT1_308090, TGGT1_313300
B	GO:0051336	enriched	regulation of hydrolase activity	1/17	22/8460	0.0433403433868	1	1.0	TGGT1_216430
C	GO:0008150	depleted	biological_process	0/13	2049/8460	0.0474803827768	0	1.0
D	GO:0006436	enriched	tryptophanyl-tRNA aminoacylation	1/38	1/8460	0.0044917257684	1	1.0	TGGT1_288360
D	GO:0006468	enriched	protein phosphorylation	4/38	164/8460	0.00601515649212	4	1.0	TGGT1_202780, TGGT1_224480, TGGT1_262730, TGGT1_265330
D	GO:0016310	enriched	phosphorylation	4/38	190/8460	0.010023434699	4	1.0	TGGT1_202780, TGGT1_224480, TGGT1_262730, TGGT1_265330
D	GO:0019222	enriched	regulation of metabolic process	3/38	128/8460	0.01941250346	3	1.0	TGGT1_214840, TGGT1_289820, TGGT1_310900
D	GO:0006464	enriched	cellular protein modification process	4/38	253/8460	0.025989108069	4	1.0	TGGT1_202780, TGGT1_224480, TGGT1_262730, TGGT1_265330
D	GO:0036211	enriched	protein modification process	4/38	253/8460	0.025989108069	4	1.0	TGGT1_202780, TGGT1_224480, TGGT1_262730, TGGT1_265330
D	GO:0043412	enriched	macromolecule modification	4/38	291/8460	0.0404458013089	4	1.0	TGGT1_202780, TGGT1_224480, TGGT1_262730, TGGT1_265330
D	GO:0006796	enriched	phosphate-containing compound metabolic process	4/38	291/8460	0.0404458013089	4	1.0	TGGT1_202780, TGGT1_224480, TGGT1_262730, TGGT1_265330
D	GO:0006793	enriched	phosphorus metabolic process	4/38	291/8460	0.0404458013089	4	1.0	TGGT1_202780, TGGT1_224480, TGGT1_262730, TGGT1_265330
E	GO:0006470	enriched	protein dephosphorylation	1/13	9/8460	0.0137515488021	1	1.0	TGGT1_268770
E	GO:0016311	enriched	dephosphorylation	1/13	15/8460	0.0228220419884	1	1.0	TGGT1_268770
E	GO:0051276	enriched	chromosome organization	1/13	23/8460	0.0347962679287	1	1.0	TGGT1_231170
F	GO:0019222	enriched	regulation of metabolic process	4/20	128/8460	0.00020075421751	4	0.2324733838766444	TGGT1_203910, TGGT1_214840, TGGT1_237280, TGGT1_247700
F	GO:0043087	enriched	regulation of GTPase activity	2/20	21/8460	0.00108544416026	2	0.4255333042600567	TGGT1_203910, TGGT1_237280
F	GO:0051336	enriched	regulation of hydrolase activity	2/20	22/8460	0.00119229747055	2	0.4255333042600567	TGGT1_203910, TGGT1_237280
F	GO:0050790	enriched	regulation of catalytic activity	2/20	27/8460	0.00179888275421	2	0.4255333042600567	TGGT1_203910, TGGT1_237280
F	GO:0065009	enriched	regulation of molecular function	2/20	28/8460	0.00193451602098	2	0.4255333042600567	TGGT1_203910, TGGT1_237280
F	GO:0050789	enriched	regulation of biological process	4/20	242/8460	0.00220483577337	4	0.4255333042600567	TGGT1_203910, TGGT1_214840, TGGT1_237280, TGGT1_247700
F	GO:0065007	enriched	biological regulation	4/20	272/8460	0.0033705276018	4	0.5575815661264221	TGGT1_203910, TGGT1_214840, TGGT1_237280, TGGT1_247700
F	GO:0006355	enriched	regulation of transcription, DNA-templated	2/20	84/8460	0.0164834615935	2	1.0	TGGT1_214840, TGGT1_247700
F	GO:1903506	enriched	regulation of nucleic acid-templated transcription	2/20	84/8460	0.0164834615935	2	1.0	TGGT1_214840, TGGT1_247700
F	GO:2001141	enriched	regulation of RNA biosynthetic process	2/20	84/8460	0.0164834615935	2	1.0	TGGT1_214840, TGGT1_247700
F	GO:0051252	enriched	regulation of RNA metabolic process	2/20	84/8460	0.0164834615935	2	1.0	TGGT1_214840, TGGT1_247700
F	GO:0019219	enriched	regulation of nucleobase-containing compound metabolic process	2/20	86/8460	0.01723394597	2	1.0	TGGT1_214840, TGGT1_247700
F	GO:2000112	enriched	regulation of cellular macromolecule biosynthetic process	2/20	91/8460	0.0191731329091	2	1.0	TGGT1_214840, TGGT1_247700
F	GO:0009889	enriched	regulation of biosynthetic process	2/20	91/8460	0.0191731329091	2	1.0	TGGT1_214840, TGGT1_247700
F	GO:0031326	enriched	regulation of cellular biosynthetic process	2/20	91/8460	0.0191731329091	2	1.0	TGGT1_214840, TGGT1_247700
F	GO:0010556	enriched	regulation of macromolecule biosynthetic process	2/20	91/8460	0.0191731329091	2	1.0	TGGT1_214840, TGGT1_247700
F	GO:0010468	enriched	regulation of gene expression	2/20	95/8460	0.0207881192999	2	1.0	TGGT1_214840, TGGT1_247700
F	GO:0031323	enriched	regulation of cellular metabolic process	2/20	99/8460	0.0224584899084	2	1.0	TGGT1_214840, TGGT1_247700
F	GO:0051171	enriched	regulation of nitrogen compound metabolic process	2/20	101/8460	0.023314107406	2	1.0	TGGT1_214840, TGGT1_247700
F	GO:0080090	enriched	regulation of primary metabolic process	2/20	101/8460	0.023314107406	2	1.0	TGGT1_214840, TGGT1_247700
F	GO:0060255	enriched	regulation of macromolecule metabolic process	2/20	107/8460	0.0259610920331	2	1.0	TGGT1_214840, TGGT1_247700
F	GO:0008152	depleted	metabolic process	0/20	1450/8460	0.0363593263583	0	1.0

## Sheet: Cellular Component
Cluster	# GO	enrichment	name	ratio_in_study	ratio_in_pop	p_uncorrected	study_count	p_fdr_bh	study_items
A	GO:0044430	enriched	cytoskeletal part	2/32	36/8460	0.00805984854017	2	1.0	TGGT1_255190, TGGT1_263510
A	GO:0005856	enriched	cytoskeleton	2/32	40/8460	0.00988551465228	2	1.0	TGGT1_255190, TGGT1_263510
A	GO:0000922	enriched	spindle pole	1/32	4/8460	0.0150470488322	1	1.0	TGGT1_263510
A	GO:0005819	enriched	spindle	1/32	4/8460	0.0150470488322	1	1.0	TGGT1_263510
A	GO:0005815	enriched	microtubule organizing center	1/32	4/8460	0.0150470488322	1	1.0	TGGT1_263510
A	GO:0016459	enriched	myosin complex	1/32	11/8460	0.0408532185638	1	1.0	TGGT1_255190
B	GO:0030125	enriched	clathrin vesicle coat	1/17	2/8460	0.00401511169017	1	0.14855913253634587	TGGT1_213030
B	GO:0098589	enriched	membrane region	1/17	2/8460	0.00401511169017	1	0.14855913253634587	TGGT1_213030
B	GO:0030140	enriched	trans-Golgi network transport vesicle	1/17	2/8460	0.00401511169017	1	0.14855913253634587	TGGT1_213030
B	GO:0005905	enriched	clathrin-coated pit	1/17	2/8460	0.00401511169017	1	0.14855913253634587	TGGT1_213030
B	GO:0012510	enriched	trans-Golgi network transport vesicle membrane	1/17	2/8460	0.00401511169017	1	0.14855913253634587	TGGT1_213030
B	GO:0030665	enriched	clathrin-coated vesicle membrane	1/17	2/8460	0.00401511169017	1	0.14855913253634587	TGGT1_213030
B	GO:0030130	enriched	clathrin coat of trans-Golgi network vesicle	1/17	2/8460	0.00401511169017	1	0.14855913253634587	TGGT1_213030
B	GO:0030132	enriched	clathrin coat of coated pit	1/17	2/8460	0.00401511169017	1	0.14855913253634587	TGGT1_213030
B	GO:0030136	enriched	clathrin-coated vesicle	1/17	2/8460	0.00401511169017	1	0.14855913253634587	TGGT1_213030
B	GO:0020008	enriched	rhoptry	1/17	5/8460	0.0100093402811	1	0.23907856183019996	TGGT1_308090
B	GO:0030658	enriched	transport vesicle membrane	1/17	5/8460	0.0100093402811	1	0.23907856183019996	TGGT1_213030
B	GO:0030133	enriched	transport vesicle	1/17	5/8460	0.0100093402811	1	0.23907856183019996	TGGT1_213030
B	GO:0044459	enriched	plasma membrane part	1/17	8/8460	0.0159696033134	1	0.23907856183019996	TGGT1_213030
B	GO:0098797	enriched	plasma membrane protein complex	1/17	8/8460	0.0159696033134	1	0.23907856183019996	TGGT1_213030
B	GO:0012506	enriched	vesicle membrane	1/17	9/8460	0.0179488409782	1	0.23907856183019996	TGGT1_213030
B	GO:0030659	enriched	cytoplasmic vesicle membrane	1/17	9/8460	0.0179488409782	1	0.23907856183019996	TGGT1_213030
B	GO:0030120	enriched	vesicle coat	1/17	9/8460	0.0179488409782	1	0.23907856183019996	TGGT1_213030
B	GO:0031982	enriched	vesicle	1/17	9/8460	0.0179488409782	1	0.23907856183019996	TGGT1_213030
B	GO:0005798	enriched	Golgi-associated vesicle	1/17	9/8460	0.0179488409782	1	0.23907856183019996	TGGT1_213030
B	GO:0044433	enriched	cytoplasmic vesicle part	1/17	9/8460	0.0179488409782	1	0.23907856183019996	TGGT1_213030
B	GO:0097708	enriched	intracellular vesicle	1/17	9/8460	0.0179488409782	1	0.23907856183019996	TGGT1_213030
B	GO:0030660	enriched	Golgi-associated vesicle membrane	1/17	9/8460	0.0179488409782	1	0.23907856183019996	TGGT1_213030
B	GO:0030662	enriched	coated vesicle membrane	1/17	9/8460	0.0179488409782	1	0.23907856183019996	TGGT1_213030
B	GO:0031410	enriched	cytoplasmic vesicle	1/17	9/8460	0.0179488409782	1	0.23907856183019996	TGGT1_213030
B	GO:0030135	enriched	coated vesicle	1/17	9/8460	0.0179488409782	1	0.23907856183019996	TGGT1_213030
B	GO:0030118	enriched	clathrin coat	1/17	11/8460	0.0218960812833	1	0.28043827182015085	TGGT1_213030
B	GO:0000139	enriched	Golgi membrane	1/17	12/8460	0.0238640972167	1	0.2943238656720606	TGGT1_213030
B	GO:0020007	enriched	apical complex	1/17	13/8460	0.0258283858466	1	0.3071733031047826	TGGT1_308090
B	GO:0044464	enriched	cell part	5/17	940/8460	0.0331967352808	5	0.3614489371133223	TGGT1_213030, TGGT1_216430, TGGT1_294280, TGGT1_308090, TGGT1_313300
B	GO:0005623	enriched	cell	5/17	940/8460	0.0331967352808	5	0.3614489371133223	TGGT1_213030, TGGT1_216430, TGGT1_294280, TGGT1_308090, TGGT1_313300
B	GO:0098805	enriched	whole membrane	1/17	17/8460	0.0336483995511	1	0.3614489371133223	TGGT1_213030
B	GO:0044431	enriched	Golgi apparatus part	1/17	18/8460	0.0355941507299	1	0.37040163103332796	TGGT1_213030
E	GO:0033655	enriched	host cell cytoplasm part	1/13	18/8460	0.0273283539838	1	0.7212279687571849	TGGT1_239740
E	GO:0065010	enriched	extracellular membrane-bounded organelle	1/13	18/8460	0.0273283539838	1	0.7212279687571849	TGGT1_239740
E	GO:0020003	enriched	symbiont-containing vacuole	1/13	18/8460	0.0273283539838	1	0.7212279687571849	TGGT1_239740
E	GO:0043230	enriched	extracellular organelle	1/13	18/8460	0.0273283539838	1	0.7212279687571849	TGGT1_239740
E	GO:0030430	enriched	host cell cytoplasm	1/13	18/8460	0.0273283539838	1	0.7212279687571849	TGGT1_239740
E	GO:0043656	enriched	intracellular region of host	1/13	19/8460	0.0288261899705	1	0.7212279687571849	TGGT1_239740
E	GO:0043657	enriched	host cell	1/13	19/8460	0.0288261899705	1	0.7212279687571849	TGGT1_239740
E	GO:0044217	enriched	other organism part	1/13	19/8460	0.0288261899705	1	0.7212279687571849	TGGT1_239740
E	GO:0044216	enriched	other organism cell	1/13	19/8460	0.0288261899705	1	0.7212279687571849	TGGT1_239740
E	GO:0044215	enriched	other organism	1/13	19/8460	0.0288261899705	1	0.7212279687571849	TGGT1_239740
E	GO:0033643	enriched	host cell part	1/13	19/8460	0.0288261899705	1	0.7212279687571849	TGGT1_239740
E	GO:0033646	enriched	host intracellular part	1/13	19/8460	0.0288261899705	1	0.7212279687571849	TGGT1_239740
E	GO:0018995	enriched	host	1/13	19/8460	0.0288261899705	1	0.7212279687571849	TGGT1_239740
E	GO:0044421	enriched	extracellular region part	1/13	20/8460	0.0303218965844	1	0.7212279687571849	TGGT1_239740
E	GO:0005694	enriched	chromosome	1/13	32/8460	0.0481052918204	1	1.0	TGGT1_231170
E	GO:0043226	enriched	organelle	3/13	553/8460	0.0485833995497	3	1.0	TGGT1_211680, TGGT1_231170, TGGT1_239740

## Sheet: Molecular Function
Cluster	# GO	enrichment	name	ratio_in_study	ratio_in_pop	p_uncorrected	study_count	p_fdr_bh	study_items
A	GO:0015439	enriched	heme-transporting ATPase activity	1/32	1/8460	0.00378250591017	1	1.0	TGGT1_318710
A	GO:0015232	enriched	heme transporter activity	1/32	1/8460	0.00378250591017	1	1.0	TGGT1_318710
A	GO:0051184	enriched	cofactor transmembrane transporter activity	1/32	2/8460	0.0075511499356	1	1.0	TGGT1_318710
A	GO:0043682	enriched	copper-transporting ATPase activity	1/32	3/8460	0.0113059812435	1	1.0	TGGT1_201150
A	GO:0004008	enriched	copper-exporting ATPase activity	1/32	3/8460	0.0113059812435	1	1.0	TGGT1_201150
A	GO:0000166	enriched	nucleotide binding	7/32	696/8460	0.0135162733875	7	1.0	TGGT1_201150, TGGT1_228750, TGGT1_253940, TGGT1_255190, TGGT1_305750, TGGT1_310220, TGGT1_318710
A	GO:1901265	enriched	nucleoside phosphate binding	7/32	696/8460	0.0135162733875	7	1.0	TGGT1_201150, TGGT1_228750, TGGT1_253940, TGGT1_255190, TGGT1_305750, TGGT1_310220, TGGT1_318710
A	GO:0043167	enriched	ion binding	9/32	1062/8460	0.0142736819534	9	1.0	TGGT1_201150, TGGT1_216620, TGGT1_228750, TGGT1_253940, TGGT1_255190, TGGT1_264860, TGGT1_305750, TGGT1_310220, TGGT1_318710
A	GO:0036094	enriched	small molecule binding	7/32	729/8460	0.0171291587099	7	1.0	TGGT1_201150, TGGT1_228750, TGGT1_253940, TGGT1_255190, TGGT1_305750, TGGT1_310220, TGGT1_318710
A	GO:0042626	enriched	ATPase activity, coupled to transmembrane movement of substances	2/32	59/8460	0.0207403425626	2	1.0	TGGT1_201150, TGGT1_318710
A	GO:0043492	enriched	ATPase activity, coupled to movement of substances	2/32	60/8460	0.0214054133426	2	1.0	TGGT1_201150, TGGT1_318710
A	GO:0005375	enriched	copper ion transmembrane transporter activity	1/32	6/8460	0.0224880880092	1	1.0	TGGT1_201150
A	GO:0015405	enriched	P-P-bond-hydrolysis-driven transmembrane transporter activity	2/32	63/8460	0.0234534791698	2	1.0	TGGT1_201150, TGGT1_318710
A	GO:0015399	enriched	primary active transmembrane transporter activity	2/32	63/8460	0.0234534791698	2	1.0	TGGT1_201150, TGGT1_318710
A	GO:0035639	enriched	purine ribonucleoside triphosphate binding	6/32	604/8460	0.0237418650689	6	1.0	TGGT1_228750, TGGT1_253940, TGGT1_255190, TGGT1_305750, TGGT1_310220, TGGT1_318710
A	GO:0001883	enriched	purine nucleoside binding	6/32	605/8460	0.0239151667248	6	1.0	TGGT1_228750, TGGT1_253940, TGGT1_255190, TGGT1_305750, TGGT1_310220, TGGT1_318710
A	GO:0001882	enriched	nucleoside binding	6/32	605/8460	0.0239151667248	6	1.0	TGGT1_228750, TGGT1_253940, TGGT1_255190, TGGT1_305750, TGGT1_310220, TGGT1_318710
A	GO:0032549	enriched	ribonucleoside binding	6/32	605/8460	0.0239151667248	6	1.0	TGGT1_228750, TGGT1_253940, TGGT1_255190, TGGT1_305750, TGGT1_310220, TGGT1_318710
A	GO:0032550	enriched	purine ribonucleoside binding	6/32	605/8460	0.0239151667248	6	1.0	TGGT1_228750, TGGT1_253940, TGGT1_255190, TGGT1_305750, TGGT1_310220, TGGT1_318710
A	GO:0032555	enriched	purine ribonucleotide binding	6/32	608/8460	0.0244402736996	6	1.0	TGGT1_228750, TGGT1_253940, TGGT1_255190, TGGT1_305750, TGGT1_310220, TGGT1_318710
A	GO:0032553	enriched	ribonucleotide binding	6/32	610/8460	0.0247946983698	6	1.0	TGGT1_228750, TGGT1_253940, TGGT1_255190, TGGT1_305750, TGGT1_310220, TGGT1_318710
A	GO:0017076	enriched	purine nucleotide binding	6/32	615/8460	0.0256961025998	6	1.0	TGGT1_228750, TGGT1_253940, TGGT1_255190, TGGT1_305750, TGGT1_310220, TGGT1_318710
A	GO:0097367	enriched	carbohydrate derivative binding	6/32	619/8460	0.0264331248471	6	1.0	TGGT1_228750, TGGT1_253940, TGGT1_255190, TGGT1_305750, TGGT1_310220, TGGT1_318710
A	GO:0017111	enriched	nucleoside-triphosphatase activity	4/32	314/8460	0.0295257869426	4	1.0	TGGT1_201150, TGGT1_255190, TGGT1_310220, TGGT1_318710
A	GO:1901363	enriched	heterocyclic compound binding	9/32	1130/8460	0.0309466375305	9	1.0	TGGT1_201150, TGGT1_203080, TGGT1_228750, TGGT1_253940, TGGT1_254210, TGGT1_255190, TGGT1_305750, TGGT1_310220, TGGT1_318710
A	GO:0097159	enriched	organic cyclic compound binding	9/32	1132/8460	0.0310819238441	9	1.0	TGGT1_201150, TGGT1_203080, TGGT1_228750, TGGT1_253940, TGGT1_254210, TGGT1_255190, TGGT1_305750, TGGT1_310220, TGGT1_318710
A	GO:0016462	enriched	pyrophosphatase activity	4/32	326/8460	0.0332633349613	4	1.0	TGGT1_201150, TGGT1_255190, TGGT1_310220, TGGT1_318710
A	GO:0016818	enriched	hydrolase activity, acting on acid anhydrides, in phosphorus-containing anhydrides	4/32	327/8460	0.0335869151074	4	1.0	TGGT1_201150, TGGT1_255190, TGGT1_310220, TGGT1_318710
A	GO:0016817	enriched	hydrolase activity, acting on acid anhydrides	4/32	328/8460	0.0339123670402	4	1.0	TGGT1_201150, TGGT1_255190, TGGT1_310220, TGGT1_318710
A	GO:0022804	enriched	active transmembrane transporter activity	2/32	80/8460	0.0364732508258	2	1.0	TGGT1_201150, TGGT1_318710
A	GO:0043168	enriched	anion binding	6/32	682/8460	0.0399882177419	6	1.0	TGGT1_228750, TGGT1_253940, TGGT1_255190, TGGT1_305750, TGGT1_310220, TGGT1_318710
A	GO:0005509	enriched	calcium ion binding	2/32	85/8460	0.0407290595516	2	1.0	TGGT1_216620, TGGT1_228750
A	GO:0005388	enriched	calcium-transporting ATPase activity	1/32	12/8460	0.0444859203052	1	1.0	TGGT1_201150
A	GO:0015085	enriched	calcium ion transmembrane transporter activity	1/32	13/8460	0.0481052918201	1	1.0	TGGT1_201150
B	GO:0004591	enriched	oxoglutarate dehydrogenase (succinyl-transferring) activity	1/17	1/8460	0.0020094562648	1	1.0	TGGT1_244200
B	GO:0010181	enriched	FMN binding	1/17	2/8460	0.00401511169017	1	1.0	TGGT1_219630
B	GO:0030976	enriched	thiamine pyrophosphate binding	1/17	2/8460	0.00401511169017	1	1.0	TGGT1_244200
B	GO:0003958	enriched	NADPH-hemoprotein reductase activity	1/17	2/8460	0.00401511169017	1	1.0	TGGT1_219630
B	GO:0016653	enriched	oxidoreductase activity, acting on NAD(P)H, heme protein as acceptor	1/17	3/8460	0.00601697301697	1	1.0	TGGT1_219630
B	GO:0016624	enriched	oxidoreductase activity, acting on the aldehyde or oxo group of donors, disulfide as acceptor	1/17	6/8460	0.0119998596443	1	1.0	TGGT1_244200
B	GO:0050662	enriched	coenzyme binding	2/17	84/8460	0.0120276924944	2	1.0	TGGT1_219630, TGGT1_244200
B	GO:1901681	enriched	sulfur compound binding	1/17	7/8460	0.0139866117602	1	1.0	TGGT1_244200
B	GO:0048037	enriched	cofactor binding	2/17	133/8460	0.0285920738144	2	1.0	TGGT1_219630, TGGT1_244200
B	GO:0005198	enriched	structural molecule activity	2/17	138/8460	0.0306106817315	2	1.0	TGGT1_213030, TGGT1_318160
B	GO:0016903	enriched	oxidoreductase activity, acting on the aldehyde or oxo group of donors	1/17	17/8460	0.0336483995511	1	1.0	TGGT1_244200
B	GO:0005096	enriched	GTPase activator activity	1/17	21/8460	0.0414093039472	1	1.0	TGGT1_216430
B	GO:0016651	enriched	oxidoreductase activity, acting on NAD(P)H	1/17	21/8460	0.0414093039472	1	1.0	TGGT1_219630
B	GO:0030695	enriched	GTPase regulator activity	1/17	22/8460	0.0433403433868	1	1.0	TGGT1_216430
B	GO:0008047	enriched	enzyme activator activity	1/17	24/8460	0.0471914439588	1	1.0	TGGT1_216430
B	GO:0060589	enriched	nucleoside-triphosphatase regulator activity	1/17	25/8460	0.0491115181004	1	1.0	TGGT1_216430
C	GO:0008469	enriched	histone-arginine N-methyltransferase activity	1/13	5/8460	0.007661444532	1	1.0	TGGT1_293370
C	GO:0016274	enriched	protein-arginine N-methyltransferase activity	1/13	5/8460	0.007661444532	1	1.0	TGGT1_293370
C	GO:0016273	enriched	arginine N-methyltransferase activity	1/13	5/8460	0.007661444532	1	1.0	TGGT1_293370
C	GO:0042054	enriched	histone methyltransferase activity	1/13	23/8460	0.0347962679287	1	1.0	TGGT1_293370
C	GO:0008276	enriched	protein methyltransferase activity	1/13	26/8460	0.0392515746341	1	1.0	TGGT1_293370
C	GO:0004402	enriched	histone acetyltransferase activity	1/13	31/8460	0.0466349221415	1	1.0	TGGT1_264820
C	GO:0061733	enriched	peptide-lysine-N-acetyltransferase activity	1/13	32/8460	0.0481052918204	1	1.0	TGGT1_264820
C	GO:0008170	enriched	N-methyltransferase activity	1/13	32/8460	0.0481052918204	1	1.0	TGGT1_293370
D	GO:0004089	enriched	carbonate dehydratase activity	1/38	1/8460	0.0044917257684	1	1.0	TGGT1_259950
D	GO:0005524	enriched	ATP binding	7/38	503/8460	0.00635187942547	7	1.0	TGGT1_202780, TGGT1_208050, TGGT1_224480, TGGT1_231170, TGGT1_262730, TGGT1_265330, TGGT1_288360
D	GO:0032559	enriched	adenyl ribonucleotide binding	7/38	507/8460	0.00662863207414	7	1.0	TGGT1_202780, TGGT1_208050, TGGT1_224480, TGGT1_231170, TGGT1_262730, TGGT1_265330, TGGT1_288360
D	GO:0004672	enriched	protein kinase activity	4/38	170/8460	0.00682191393262	4	1.0	TGGT1_202780, TGGT1_224480, TGGT1_262730, TGGT1_265330
D	GO:0030554	enriched	adenyl nucleotide binding	7/38	514/8460	0.00713470981342	7	1.0	TGGT1_202780, TGGT1_208050, TGGT1_224480, TGGT1_231170, TGGT1_262730, TGGT1_265330, TGGT1_288360
D	GO:0008144	enriched	drug binding	7/38	529/8460	0.00831644487298	7	1.0	TGGT1_202780, TGGT1_208050, TGGT1_224480, TGGT1_231170, TGGT1_262730, TGGT1_265330, TGGT1_288360
D	GO:0050321	enriched	tau-protein kinase activity	1/38	2/8460	0.0089638045508	1	1.0	TGGT1_265330
D	GO:0004830	enriched	tryptophan-tRNA ligase activity	1/38	2/8460	0.0089638045508	1	1.0	TGGT1_288360
D	GO:0035639	enriched	purine ribonucleoside triphosphate binding	7/38	604/8460	0.0165224813236	7	1.0	TGGT1_202780, TGGT1_208050, TGGT1_224480, TGGT1_231170, TGGT1_262730, TGGT1_265330, TGGT1_288360
D	GO:0001883	enriched	purine nucleoside binding	7/38	605/8460	0.0166609740149	7	1.0	TGGT1_202780, TGGT1_208050, TGGT1_224480, TGGT1_231170, TGGT1_262730, TGGT1_265330, TGGT1_288360
D	GO:0001882	enriched	nucleoside binding	7/38	605/8460	0.0166609740149	7	1.0	TGGT1_202780, TGGT1_208050, TGGT1_224480, TGGT1_231170, TGGT1_262730, TGGT1_265330, TGGT1_288360
D	GO:0032549	enriched	ribonucleoside binding	7/38	605/8460	0.0166609740149	7	1.0	TGGT1_202780, TGGT1_208050, TGGT1_224480, TGGT1_231170, TGGT1_262730, TGGT1_265330, TGGT1_288360
D	GO:0032550	enriched	purine ribonucleoside binding	7/38	605/8460	0.0166609740149	7	1.0	TGGT1_202780, TGGT1_208050, TGGT1_224480, TGGT1_231170, TGGT1_262730, TGGT1_265330, TGGT1_288360
D	GO:0016773	enriched	phosphotransferase activity, alcohol group as acceptor	4/38	222/8460	0.0169473134828	4	1.0	TGGT1_202780, TGGT1_224480, TGGT1_262730, TGGT1_265330
D	GO:0032555	enriched	purine ribonucleotide binding	7/38	608/8460	0.0170814738721	7	1.0	TGGT1_202780, TGGT1_208050, TGGT1_224480, TGGT1_231170, TGGT1_262730, TGGT1_265330, TGGT1_288360
D	GO:0032553	enriched	ribonucleotide binding	7/38	610/8460	0.0173660183591	7	1.0	TGGT1_202780, TGGT1_208050, TGGT1_224480, TGGT1_231170, TGGT1_262730, TGGT1_265330, TGGT1_288360
D	GO:0017076	enriched	purine nucleotide binding	7/38	615/8460	0.0180922722917	7	1.0	TGGT1_202780, TGGT1_208050, TGGT1_224480, TGGT1_231170, TGGT1_262730, TGGT1_265330, TGGT1_288360
D	GO:0097367	enriched	carbohydrate derivative binding	7/38	619/8460	0.0186887659225	7	1.0	TGGT1_202780, TGGT1_208050, TGGT1_224480, TGGT1_231170, TGGT1_262730, TGGT1_265330, TGGT1_288360
D	GO:0003700	enriched	DNA-binding transcription factor activity	2/38	48/8460	0.0194618967776	2	1.0	TGGT1_214840, TGGT1_310900
D	GO:0016301	enriched	kinase activity	4/38	237/8460	0.0210230330507	4	1.0	TGGT1_202780, TGGT1_224480, TGGT1_262730, TGGT1_265330
D	GO:0140110	enriched	transcription regulator activity	2/38	51/8460	0.0218138284481	2	1.0	TGGT1_214840, TGGT1_310900
D	GO:0004712	enriched	protein serine/threonine/tyrosine kinase activity	1/38	5/8460	0.0222629934935	1	1.0	TGGT1_224480
D	GO:0043168	enriched	anion binding	7/38	682/8460	0.0300260836272	7	1.0	TGGT1_202780, TGGT1_208050, TGGT1_224480, TGGT1_231170, TGGT1_262730, TGGT1_265330, TGGT1_288360
D	GO:0000166	enriched	nucleotide binding	7/38	696/8460	0.0330755702548	7	1.0	TGGT1_202780, TGGT1_208050, TGGT1_224480, TGGT1_231170, TGGT1_262730, TGGT1_265330, TGGT1_288360
D	GO:1901265	enriched	nucleoside phosphate binding	7/38	696/8460	0.0330755702548	7	1.0	TGGT1_202780, TGGT1_208050, TGGT1_224480, TGGT1_231170, TGGT1_262730, TGGT1_265330, TGGT1_288360
D	GO:0036094	enriched	small molecule binding	7/38	729/8460	0.0410856684944	7	1.0	TGGT1_202780, TGGT1_208050, TGGT1_224480, TGGT1_231170, TGGT1_262730, TGGT1_265330, TGGT1_288360
E	GO:0031071	enriched	cysteine desulfurase activity	1/13	5/8460	0.007661444532	1	1.0	TGGT1_300120
E	GO:0004576	enriched	oligosaccharyl transferase activity	1/13	7/8460	0.0107108225351	1	1.0	TGGT1_211680
E	GO:0004579	enriched	dolichyl-diphosphooligosaccharide-protein glycotransferase activity	1/13	7/8460	0.0107108225351	1	1.0	TGGT1_211680
E	GO:0016783	enriched	sulfurtransferase activity	1/13	7/8460	0.0107108225351	1	1.0	TGGT1_300120
E	GO:0008138	enriched	protein tyrosine/serine/threonine phosphatase activity	1/13	8/8460	0.0122322657276	1	1.0	TGGT1_268770
E	GO:0016782	enriched	transferase activity, transferring sulfur-containing groups	1/13	8/8460	0.0122322657276	1	1.0	TGGT1_300120
E	GO:0016209	enriched	antioxidant activity	1/13	17/8460	0.0258283858466	1	1.0	TGGT1_211680
F	GO:0005096	enriched	GTPase activator activity	2/20	21/8460	0.00108544416026	2	0.48684526111567894	TGGT1_203910, TGGT1_237280
F	GO:0030695	enriched	GTPase regulator activity	2/20	22/8460	0.00119229747055	2	0.48684526111567894	TGGT1_203910, TGGT1_237280
F	GO:0008047	enriched	enzyme activator activity	2/20	24/8460	0.00142053126059	2	0.48684526111567894	TGGT1_203910, TGGT1_237280
F	GO:0060589	enriched	nucleoside-triphosphatase regulator activity	2/20	25/8460	0.00154186939387	2	0.48684526111567894	TGGT1_203910, TGGT1_237280
F	GO:0030234	enriched	enzyme regulator activity	2/20	40/8460	0.00392461479577	2	0.909345251925233	TGGT1_203910, TGGT1_237280
F	GO:0098772	enriched	molecular function regulator	2/20	42/8460	0.00431992993789	2	0.909345251925233	TGGT1_203910, TGGT1_237280
F	GO:0003700	enriched	DNA-binding transcription factor activity	2/20	48/8460	0.00561173801971	2	0.9971717961798476	TGGT1_214840, TGGT1_247700
F	GO:0140110	enriched	transcription regulator activity	2/20	51/8460	0.00631621090217	2	0.9971717961798476	TGGT1_214840, TGGT1_247700
F	GO:0016859	enriched	cis-trans isomerase activity	1/20	19/8460	0.0440201110062	1	1.0	TGGT1_228360
F	GO:0003755	enriched	peptidyl-prolyl cis-trans isomerase activity	1/20	19/8460	0.0440201110062	1	1.0	TGGT1_228360
